# Supplementary material for: Synthesis and structure of divalent thulium borohydrides, and their application in ε-caprolactone polymerisation
Source: Royal Society of Chemistry journal article supplement (doi:10.1039/c1cc15294g), 2011-01-01
Supplement: c1cc15294g.pdf [file c1cc15294g.pdf]

## Electronic supporting Info

### Synthesis and structure of divalent thulium borohydrides, and their application in $\epsilon$ -caprolactone polymerisation.

Aurélien Momin, Fanny Bonnet\*, Marc Visseaux\*, Laurent Maron, Josef Takats, Michael J. Ferguson, Xavier-Frédéric Le Goff, and François Nief\*

#### Experimental part:

**Material.** All operations were performed under dry argon by using Schlenk techniques and a glove box. The solvents were dried over sodium/benzophenone ketyl, deoxygenated, and stored over molecular sieves (3A) in a glovebox.  $\epsilon$ -caprolactone (99% from Aldrich) was dried over calcium hydride, distilled and stored over molecular sieves (3A) in a glovebox. Dicumylperoxide, *tert*-butylperoxide, and AIBN (Aldrich) were used as received.  $^1\text{H}$  spectra of the poly( $\epsilon$ -caprolactone) were recorded on Bruker Avance spectrometers. The chemical shifts were calibrated using the residual resonances of the solvent. NMR spectra of **1** and **2** were measured on Bruker Avance and Varian Inova spectrometers, respectively. Size exclusion chromatography of the polymers was performed in THF as an eluent at 40 °C (1 mL min<sup>-1</sup>) with a Waters SIS HPLC pump, a Waters 410 refractometer, and Waters Styragel columns (HR2, HR3, HR4, and HR5E) calibrated with polystyrene standards. Molecular weights were corrected by a factor of 0.56 for the determination of true number-average molecular weight of polycaprolactone. Elemental analyses for **1** and **2** were performed at the Universities of Lille and Alberta, respectively.

**Synthesis of [Tm(BH<sub>4</sub>)<sub>2</sub>(DME)<sub>2</sub>] (**1**). First route:** A round-bottom flask containing [Tm(BH<sub>4</sub>)<sub>3</sub>(THF)<sub>3</sub>] (701 mg, 1.63 mmol) and KC<sub>8</sub> (600 mg, 4.44 mmol) was fitted to a reversible Schlenk filtration apparatus and evacuated. DME (ca. 20 mL) was condensed onto the solids at -78°C. The resulting dark suspension was stirred at this temperature for 30 minutes and filtered under vacuum. The residue was continuously extracted with DME at low temperature, by recondensing DME at -78°C. The dark filtrate was concentrated to ca. 10mL and **1** was obtained as a black microcrystalline solid by crystallisation at -40°C (251 mg, 663  $\mu\text{mol}$ , 41 %). **Second route:** In a helium/argon glove box, DME (20 mL) was added to a mixture of [TmI<sub>2</sub>(THF)<sub>3</sub>]<sup>1</sup> (500 mg, 782  $\mu\text{mol}$ , 1.0 eq.) and KBH<sub>4</sub> (85 mg, 1.6 mmol, 2.0 eq.). The mixture was stirred for 2 h at room temperature. The dark brown supernatant was separated by centrifugation, concentrated to saturation (ca. 3 mL). After two days at -40°C, a black microcrystalline solid precipitated and was washed with pentane. A second batch of crystals was obtained by concentrating the supernatant to ca. 1.5 mL and cooling at -40°C overnight. Global yield of **1**: 258 mg (685  $\mu\text{mol}$ , 88 %).  $^1\text{H}$  NMR (300 MHz, THF-*d*<sup>8</sup>, 20 °C):  $\delta$  (ppm) -96.2 (broad s,  $w_{1/2}$  = 3.7 kHz, BH<sub>4</sub>).  $\mu_{\text{eff}}$  (Evans' method) = 4.8 $\mu_B$ . Crystals suitable

<sup>1</sup> [TmI<sub>2</sub>(THF)<sub>3</sub>] was obtained by extraction of TmI<sub>2</sub> with THF: F. Nief, B. Tayart de Borms, L. Ricard and D. Carmichael, *Eur. J. Inorg. Chem.*, 2005, 637-643. The TmI<sub>2</sub> used in the extraction procedure can either be of commercial origin or synthesised by the solid-state direct reaction of Tm powder and I<sub>2</sub> according to M. N. Bochkarev and A. A. Fagin, *Chem.-Eur. J.*, 1999, **5**, 2990-2992.

for X-Ray analysis were obtained from DME at  $-30^{\circ}\text{C}$ . Anal.: % Calcd. for  $\text{C}_8\text{H}_{28}\text{B}_2\text{O}_4\text{Tm} = 378.86$ , C: 25.36, H: 7.45; found, C: 24.20, H: 7.75.

**Synthesis of  $[(\text{Tp}^{\text{tBu,Me}})\text{Tm}(\text{BH}_4)(\text{THF})]$  (2):** In a helium/argon glove box, a solution of  $\text{KTp}^{\text{tBu,Me}}$  (170mg,  $367\mu\text{mol}$ , 1.0 q.) in 8mL of THF was added dropwise over 5 minutes to a solution of  $[\text{Tm}(\text{BH}_4)_2(\text{DME})_2]$  (149 mg,  $395\mu\text{mol}$ , 1.1eq.) in 5mL of THF. The reaction mixture was stirred for 2h at room temperature, resulting in a dark brown suspension. THF was thoroughly removed *in vacuo* and the residue was extracted with three portions of 10 mL of pentane. The residue was separated by centrifugation and the supernatant concentrated to ca. 20 mL. Overnight crystallisation at  $-40^{\circ}\text{C}$  yielded a dark brown crystalline solid (138 mg,  $203\mu\text{mol}$ , 55 %).  $^1\text{H}$  NMR (400 MHz,  $\text{C}_6\text{D}_6$ , 300 K) (Figure S1):  $\delta$  (ppm) 26.4 (broad s,  $w_{1/2} = 500$  Hz, 27 H,  $3\text{-}^i\text{Bu}^{\text{pz}}$ ), 5.8 (broad s,  $w_{1/2} = 600$  Hz, 3 H,  $4\text{-}H^{\text{pz}}$ ), -1.2 (broad s,  $w_{1/2} = 100$  Hz, 9 H, 5-Me), -10.0 (broad s,  $w_{1/2} = 285$  Hz, 1H,  $\text{BH}^{\text{Tp}}$ ), -16.5 (broad s,  $w_{1/2} = 200$  Hz, 4 H, THF), -36.6 (broad s,  $w_{1/2} = 400$  Hz, 4 H, THF), -89.2 (broad s,  $w_{1/2} = 875$  Hz, 4 H,  $\text{BH}_4$ ).  $^{11}\text{B}$  NMR (128 MHz,  $\text{C}_6\text{D}_6$ ,  $27^{\circ}\text{C}$ ):  $\delta$  (ppm) -41.7 (broad s,  $w_{1/2} = 300$  Hz,  $\text{BH}^{\text{Tp}}$ ), -216.8 (broad s,  $w_{1/2} = 285$  Hz,  $\text{BH}_4$ ); Decomposition products start to appear after a few hours at room temperature. Crystals suitable for X-Ray analysis were obtained from a dilute pentane solution at  $-40^{\circ}\text{C}$ . Anal.: % Calcd. for  $\text{C}_{28}\text{H}_{52}\text{B}_2\text{N}_6\text{OTm} = 679.31$ , C: 49.51, H: 7.72, N: 12.37; % Found, C: 49.38, H: 7.82, N: 11.90.

**Typical  $\epsilon$ -caprolactone polymerisation.** In a glove box under argon ( $\text{H}_2\text{O}$  and  $\text{O}_2 < 2$  ppm), the initiator is dissolved in the appropriate amount of dry and degassed THF.  $\epsilon$ -caprolactone was then added under vigorous stirring. Instant change of colour was observed from dark-brown to colourless. The reaction was then stirred at room temperature for a given time. The reaction was quenched by addition of some methanol drops. The polymer was dissolved in wet THF, poured in a large excess of ethanol, filtered and dried under vacuum.  $^1\text{H}$  and  $^{13}\text{C}$  NMR analysis of the polymers was performed in  $\text{CDCl}_3$  at room temperature. NMR data of a poly( $\epsilon$ -caprolactone) prepared *via* ring-opening polymerisation of  $\epsilon$ -CL initiated by 1 in THF with  $[\epsilon\text{-CL}]_0 / [\text{Tm}]_0 = 100$ ,  $M_n(\text{RMN}) = 5100$  g/mol (run 1):  $^1\text{H}$  NMR (300 MHz,  $\text{CDCl}_3$ , 293 K) (Figure S2):  $\text{HO}(\text{CH}_2)_5\text{C}(\text{O})\{\text{O}(\text{CH}_2)_5\text{C}(\text{O})\}_n\text{O}(\text{CH}_2)_6\text{OH}$ ,  $\delta$  (ppm): 4.05 ( $\text{OCH}_2$ ); 3.64 ( $\text{HOCH}_2$ ); 2.30 ( $\text{CH}_2\text{C}(\text{O})$ ); 1.64 ( $\text{CH}_2\text{CH}_2\text{CH}_2$ ); 1.37 ( $\text{CH}_2\text{CH}_2\text{CH}_2$ ).  $^{13}\text{C}$  NMR data in  $\text{CDCl}_3$ , 293 K (Figure S3):  $\text{HO}(\text{CH}_2)_5\text{C}(\text{O})\{\text{O}(\text{CH}_2)_5\text{C}(\text{O})\}_n\text{O}(\text{CH}_2)_6\text{OH}$ ,  $\delta$  (ppm): 173.6 ( $\text{CH}_2\text{CO}$ ); 64.2 ( $\text{OCH}_2$ ); 62.7 ( $\text{HOCH}_2$ ); 34.2 ( $\text{CH}_2\text{CO}$ ); 28.4, 25.6, 24.7 ( $\text{CH}_2\text{CH}_2\text{CH}_2$ ).

**NMR scale reaction of 1 with  $^t\text{BuOO}^t\text{Bu}$ :** In the glove box, 0.5 equiv of di-*tert*-butylperoxide was added to 5 mg of 1 in anhydrous  $\text{THF-}d_8$  at room temperature. The initial dark-brown solution turned instantly colourless. A new large signal at -145ppm was attributed to  $\text{O}^t\text{Bu}$  bonded to  $\text{Tm}^{\text{III}}$  (See manuscript for details).

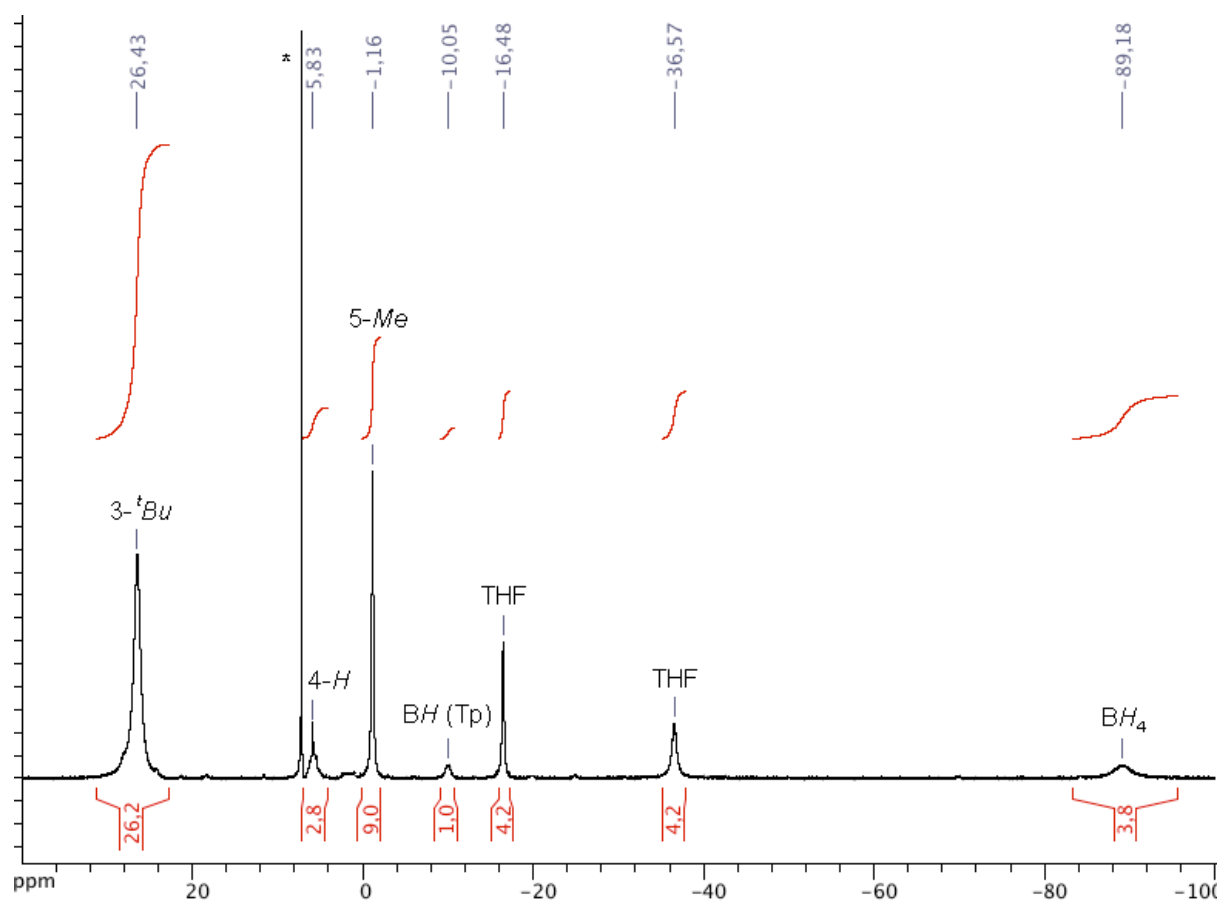

Figure S1  $^1\text{H}$  NMR spectrum of  $[(\text{Tp}^{\text{tBu,Me}})\text{Tm}(\text{BH}_4)(\text{THF})]$  (2) in  $\text{C}_6\text{D}_6$  at 300 K. The starred peak denotes residual  $\text{C}_6\text{D}_5\text{H}$ .

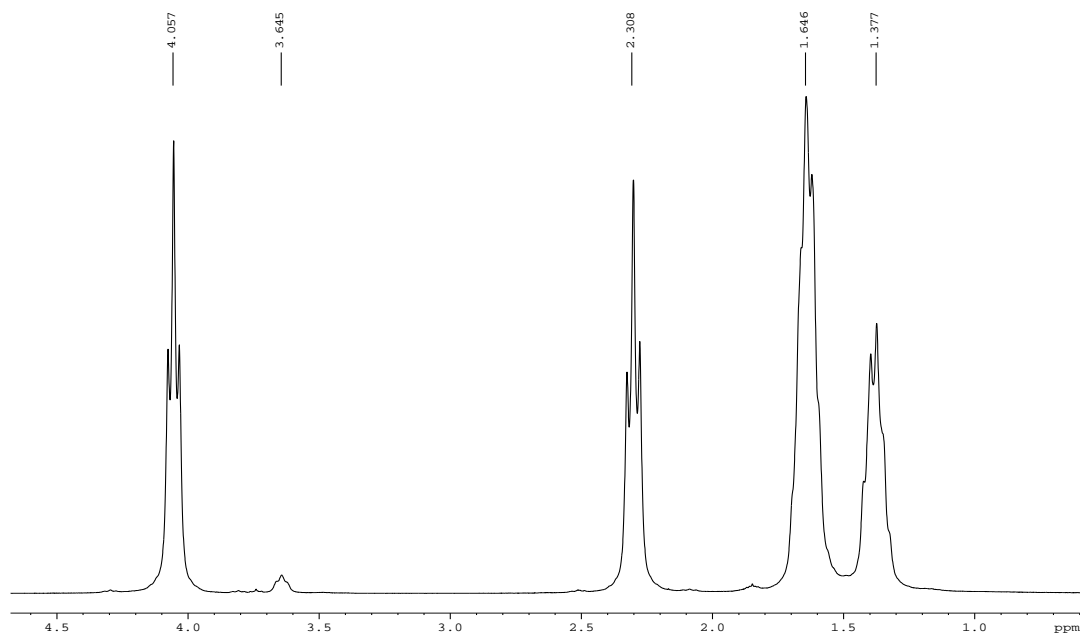

Figure S2  $^1\text{H}$  NMR spectrum of poly( $\epsilon$ -caprolactone) in  $\text{CDCl}_3$  at 293 K,  $M_n(\text{NMR}) = 5100$  g/mol

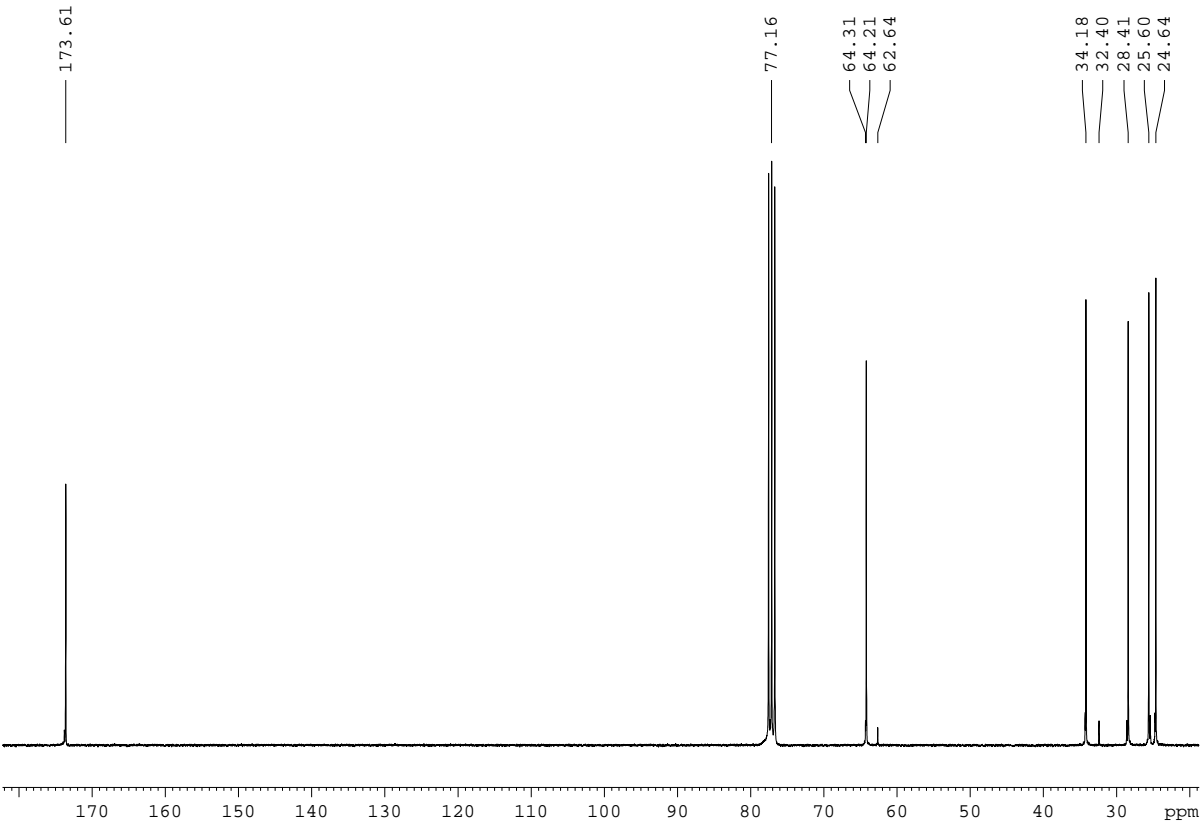

**Figure S3**  $^{13}\text{C}$  NMR spectrum of poly( $\epsilon$ -caprolactone) in  $\text{CDCl}_3$  at 293 K,  $M_n(\text{NMR}) = 5100$  g/mol
